# Supplementary material
Source: publisher figshare collection journal article supplement (https://gsajournals.figshare.com/ndownloader/files/28547718)
Supplement: Supplementary file 1 [file 28547718]

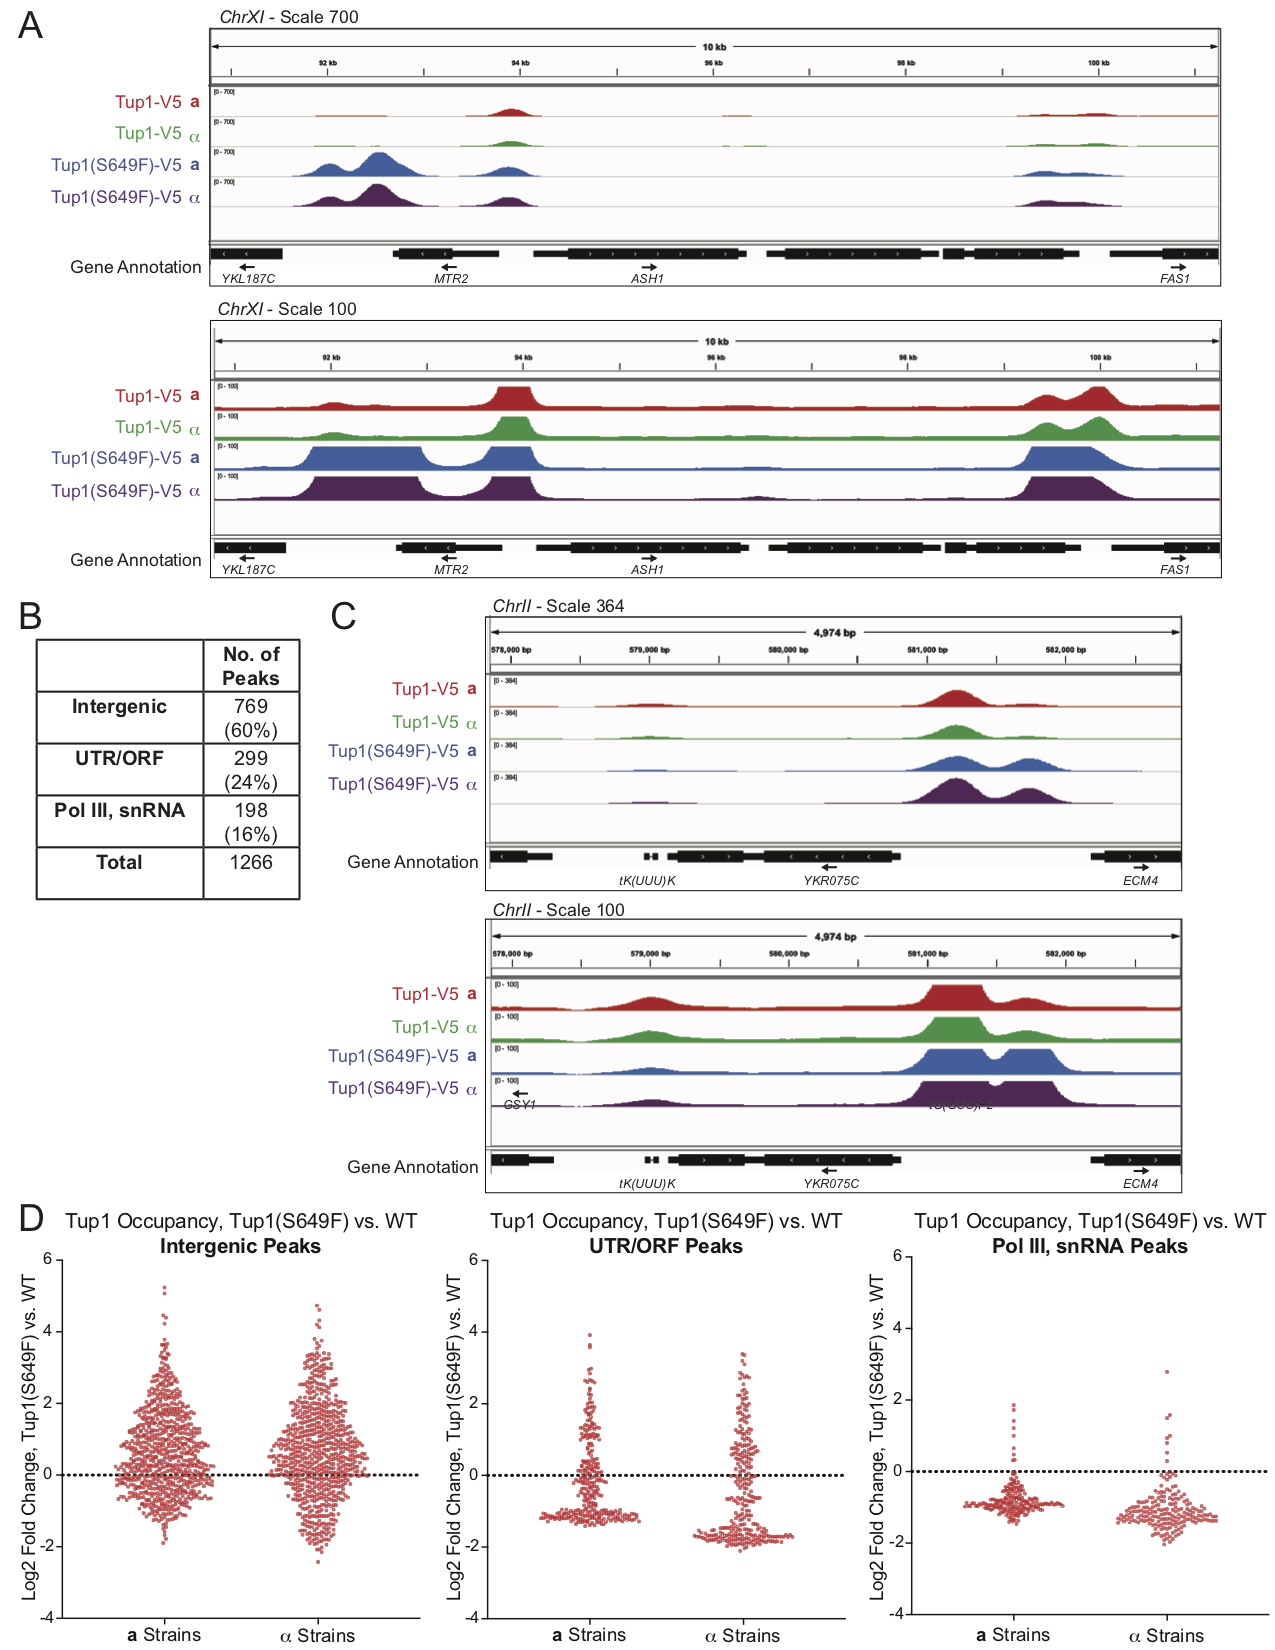


Figure S3. Categorization and occupancy features of genomic Tup1 peaks.

(A) Genome snapshots from the genome browser IGV (Broad Institute) show ChIP-Seq occupancy results for a portion of chromosome XI with representative peaks that seem to appear or shift position in the *tup1(S649F)* mutant strains. Each track represents the average of triplicate samples. Colors are as follows: Tup1-V5 WT **a** (red), Tup1-V5 WT  (green), Tup1(S649F)-V5 **a** (blue) and Tup1(S649F)-V5  (purple). The bottom track displays gene annotations. Both panels show the same genomic location; the top panel is scaled differently than the lower panel to illustrate Tup1 enrichment in strains with vastly different occupancy levels.

(B) The table lists the number and percentage of Tup1 peaks in different genomic locations: intergenic, UTR/ORF, or Pol III / snRNA depending upon the position of the majority of peak occupancy.

(C) Genome snapshots from the genome browser IGV (Broad Institute) show ChIP-Seq occupancy results for a portion of chromosome II that contains a tRNA peak and an intergenic double peak. Each track represents the average of triplicate samples. Colors are as follows: Tup1-V5 WT **a** (red), Tup1-V5 WT  (green), Tup1(S649F)-V5 **a** (blue) and Tup1(S649F)-V5  (purple). The bottom track displays gene annotations. Both panels show the same genomic location; the top panel is scaled differently than the lower panel to illustrate the difference in Tup1 enrichment between the intergenic and tRNA peaks.

(D) Violin plots display the log2 fold change in Tup1(S649F) to Tup1 wild-type occupancy in **a** and  strains at groups of peaks, including those located within intergenic regions (Left), over UTR/ORFs (Middle) and over Pol III genes and snRNAs (Right). Each point represents a single peak from the Table in (A).
